# Supplementary figures and images for: Organelle calcium-derived voltage oscillations in pacemaker neurons drive the motor program for food-seeking behavior in Aplysia
Source: eLife journal article supplement (doi:10.7554/elife.68651), 2021-06-30

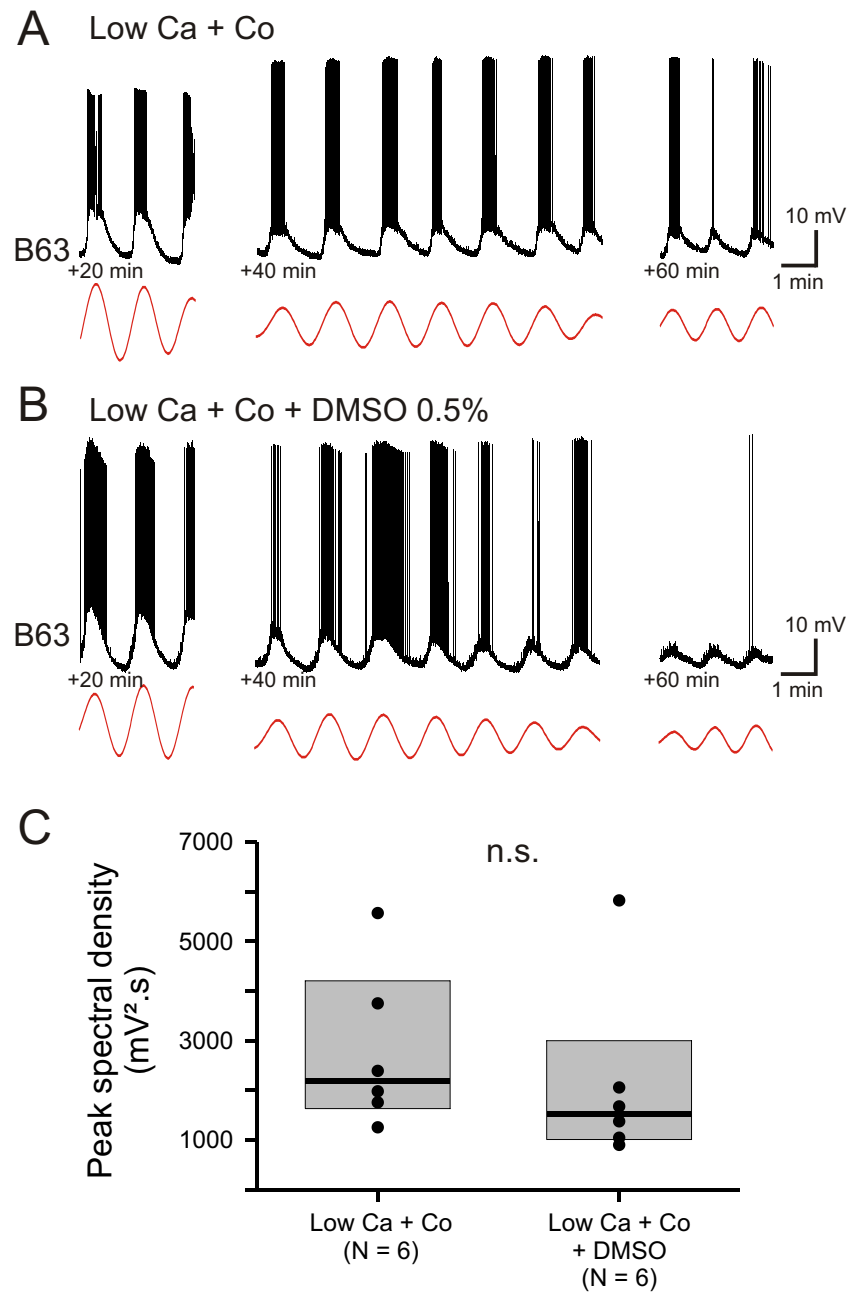

Figure 9-figure supplement 1

Supplement: supp [file elife-68651-supp-v1.zip]

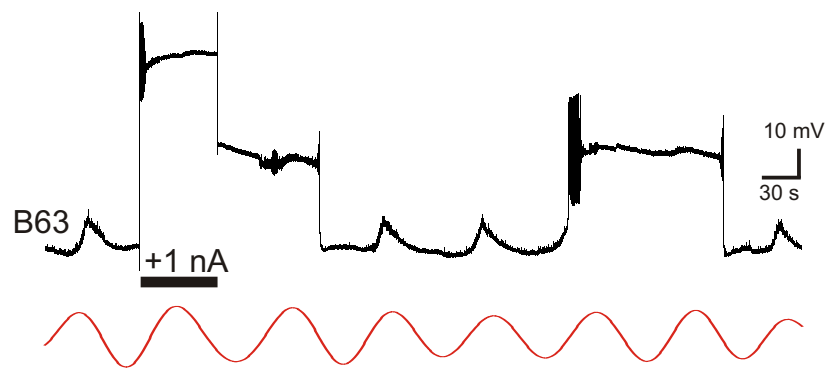

Figure 3-figure supplement 1

Supplement: supp [file elife-68651-supp-v1.zip]

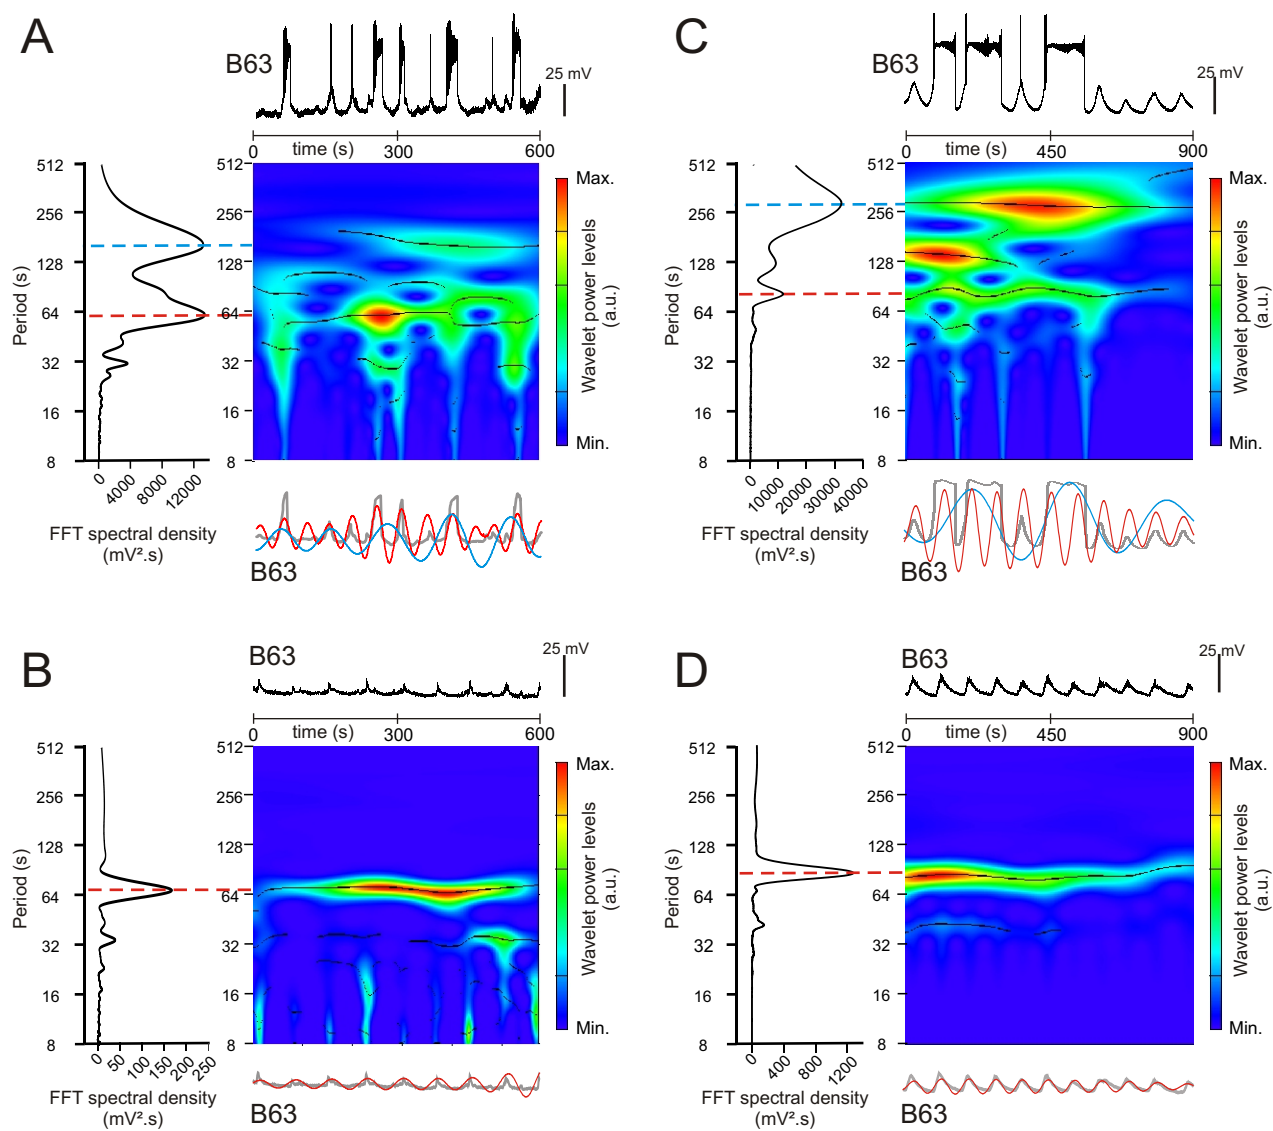

Figure 2-figure supplement 1

Supplement: supp [file elife-68651-supp-v1.zip]

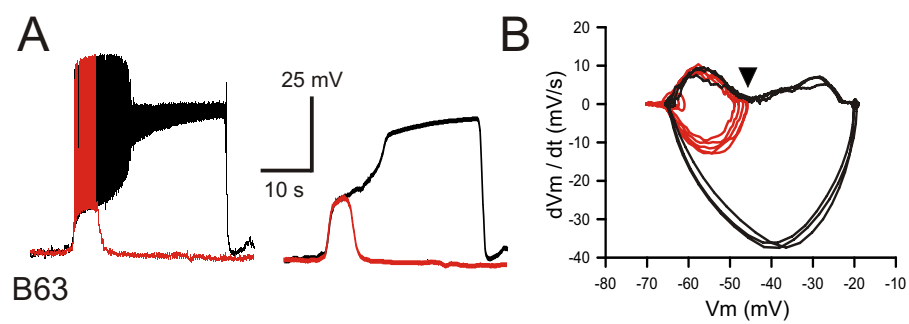

Figure 4-figure supplement 1

Supplement: supp [file elife-68651-supp-v1.zip]

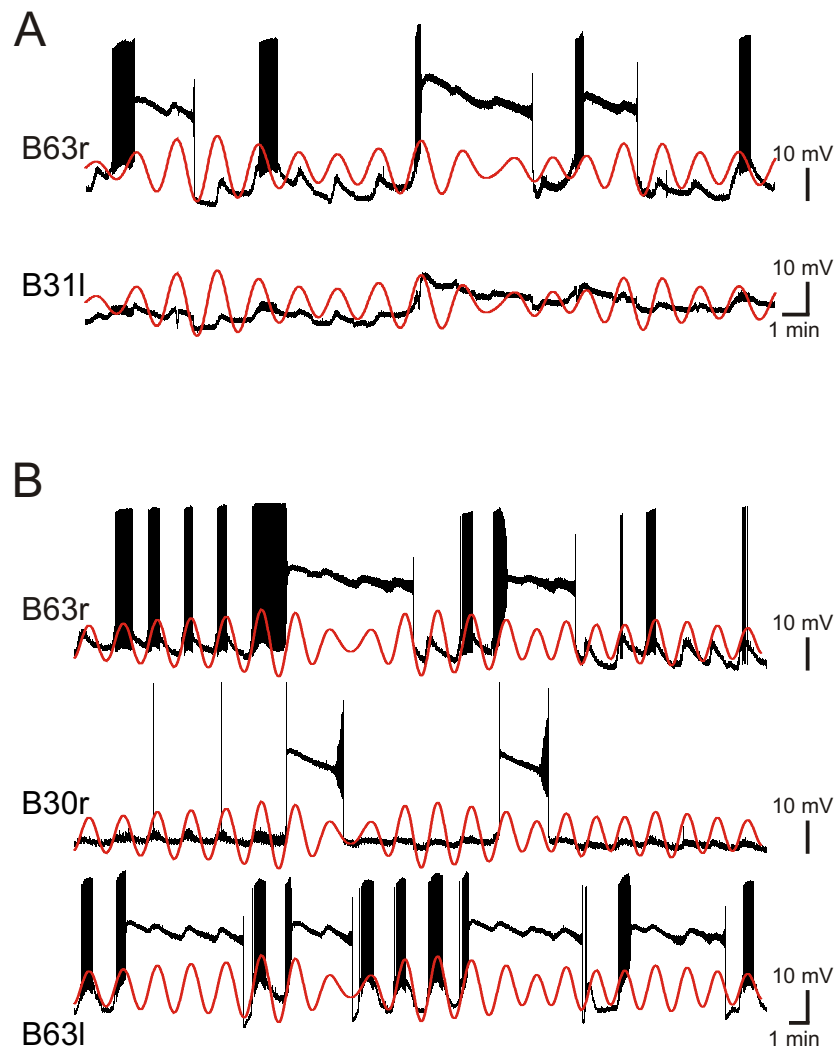

Figure 6-figure supplement 1

Supplement: supp [file elife-68651-supp-v1.zip]
